1 **Title:** Subtle perturbations of the maize methylome reveal genes and transposons silenced by  
2 DNA methylation

3

4 **Authors:** Sarah N. Anderson<sup>1</sup>, Greg Zynda<sup>2</sup>, Jawon Song<sup>2</sup>, Zhaoxue Han<sup>3</sup>, Matthew Vaughn<sup>2</sup>,  
5 Qing Li<sup>4\*</sup>, Nathan M. Springer<sup>1\*</sup>

6 \*Co-corresponding authors

7 <sup>1</sup> Department of Plant and Microbial Biology; University of Minnesota; St. Paul, MN, 55108, USA

8 <sup>2</sup> Texas Advanced Computing Center, University of Texas; Austin TX 78758, USA

9 <sup>3</sup> State Key Laboratory of Crop Stress Biology for Arid Areas, Northwest A&F University,

10 Yangling 712100, Shaanxi, China

11 <sup>4</sup> National Key Laboratory of Crop Genetic Improvement, Huazhong Agricultural University,

12 Wuhan, Hubei, 430070, China

13 **Running title:** Maize methylation impacts genes and TEs

14

15 **Key words/phrases:** DNA methylation, chromomethylases, transposable elements, RNA

16 directed DNA methylation, maize

17

18 **Corresponding authors:**

19

20 Nathan M. Springer

21 140 Gortner Laboratory

22 1479 Gortner Ave.

23 St. Paul, MN, 55108

24 612-624-6241

25 springer@umn.edu

26

27 Qing Li

28 National Key Laboratory of Crop Genetic Improvement

29 Huazhong Agricultural University

30 No.1 Shizishan Street, Hongshan District

31 Wuhan, Hubei, 430070, China

32 qingli@mail.hzau.edu.cn

33

34

## ABSTRACT

35 DNA methylation is a chromatin modification that can provide epigenetic regulation of gene and  
36 transposon expression. Plants utilize several pathways to establish and maintain DNA  
37 methylation in specific sequence contexts. The chromomethylase (CMT) genes maintain CHG  
38 (where H = A, C or T) methylation. The RNA-directed DNA methylation (RdDM) pathway is  
39 important for CHH methylation. Transcriptome analysis was performed in a collection of *Zea*  
40 *mays* lines carrying mutant alleles for CMT or RdDM-associated genes. While the majority of  
41 the transcriptome was not affected, we identified sets of genes and transposon families  
42 sensitive to context-specific decreases in DNA methylation in mutant lines. Many of the genes  
43 that are up-regulated in CMT mutant lines have high levels of CHG methylation, while genes  
44 that are differentially expressed in RdDM mutants are enriched for having nearby mCHH  
45 islands, providing evidence that context-specific DNA methylation directly regulates expression  
46 of a small number of genes. The analysis of a diverse set of inbred lines revealed that many  
47 genes regulated by CMTs exhibit natural variation for DNA methylation and gene expression.  
48 Transposon families with differential expression in the mutant genotypes show few defining  
49 features, though several families up-regulated in RdDM mutants show enriched expression in  
50 endosperm, highlighting the importance for this pathway during reproduction. Taken together,  
51 our findings suggest that while the number of genes and transposon families whose expression  
52 is reproducibly affected by mild perturbations in context-specific methylation is small, there are  
53 distinct patterns for loci impacted by RdDM and CMT mutants.

54

55

## INTRODUCTION

56 The epigenome describes the potential for additional heritable information that can be passed  
57 on through mitosis or meiosis (Hofmeister *et al.* 2017). DNA methylation is one molecular  
58 mechanism that can provide epigenetic information. There is interest in the potential for cryptic

59 information present in genomes that is normally silenced by epigenetic mechanisms but could  
60 be activated through epigenetic changes without requiring any genetic change.

61

62 Much is known about the mechanisms that control DNA methylation and the functional roles of  
63 DNA methylation in regulating transposon and gene expression in the model plant *Arabidopsis*  
64 *thaliana*. However, our knowledge of the regulating mechanisms and function of DNA  
65 methylation is much more limited in crop plants. Evidence in rice and maize suggests that major  
66 perturbations of DNA methylation disrupt development and the seeds/plants are not viable  
67 (Yamauchi *et al.* 2014; Hu *et al.* 2014; Li *et al.* 2014). Forward genetic screens for factors  
68 involved in epigenetic phenomena such as paramutation (Dorweiler *et al.* 2000; Hollick *et al.*  
69 2005; Alleman *et al.* 2006; Hale *et al.* 2007; Jr *et al.* 2009) or transgene silencing (McGinnis *et*  
70 *al.* 2006) have identified several genes that are associated with DNA methylation or chromatin  
71 in maize (Hollick 2017). In addition, reverse genetic approaches have been utilized in attempts  
72 to document the function of putative methyltransferase genes or other genes associated with  
73 DNA methylation (Papa *et al.* 2001; Makarevitch *et al.* 2007; Li *et al.* 2014). To date, these  
74 mutants have provided partial reductions in DNA methylation in specific sequence contexts but  
75 no mutants with drastic reductions to genomic DNA methylation have been recovered in maize.

76

77 Surveys of natural variation for DNA methylation among diverse lines of maize have revealed  
78 many examples of differentially methylated regions (DMRs) (Eichten *et al.* 2011, 2013; Regulski  
79 *et al.* 2013; Li *et al.* 2015a). A subset of the genes located near DMRs exhibit a negative  
80 correlation between DNA methylation and gene expression (Eichten *et al.* 2013; Li *et al.* 2015a).  
81 This is primarily found at genes that have CG or CHG methylation in regions surrounding the  
82 transcriptional start site (TSS) and show qualitative (on/off) expression variation among  
83 genotypes (Li *et al.* 2015a). This suggests the potential for cryptic information in the maize

84 genome that is epigenetically silenced in some lines but can be active due to epigenetic  
85 changes in other genotypes.

86

87 Several maize mutant lines with subtle perturbations of genomic DNA methylation have been  
88 previously identified (Li *et al.* 2014). The mutants include *mop1* and *mop3*, two mutants  
89 recovered in screens for factors required for maintenance of the paramutated state at the B'  
90 locus (Dorweiler *et al.* 2000). The *Mop1* gene encodes an RNA-dependent RNA polymerase  
91 related to RDR2 in *Arabidopsis* (Alleman *et al.* 2006) while *Mop3* is predicted to encode the  
92 second largest subunit of RNA Pol IV (Sloan *et al.* 2014), which is allelic to *rnr6* (Erhard *et al.*  
93 2009). Mutant alleles for the two chromomethylase genes present in the maize genome, *Zmet2*  
94 and *Zmet5* also influence context-specific DNA methylation patterns (Papa *et al.* 2001;  
95 Makarevitch *et al.* 2007; Li *et al.* 2014). These genes are likely paralogs resulting from a whole  
96 genome duplication event and are orthologous to *CMT3* from *Arabidopsis thaliana*. Previous  
97 research has found that *mop1* and *mop3* genotypes have lost CHH methylation at many  
98 genomic regions with elevated CHH, and there are changes in CG and CHG at these sites as  
99 well (Li *et al.* 2014). However, as these types of regions are quite rare in the maize genome  
100 these mutants have minimal effects on genome-wide levels of CG and CHG methylation. The  
101 *zmet2-m1* mutant and, to a lesser extent, the *zmet5-m1* mutant, result in reduction of CHG  
102 methylation. These mutants also cause reductions of CWA methylation (where W is A or T) in  
103 genomic regions with low, but detectable, CWA methylation (Li *et al.* 2014; Gouil and  
104 Baulcombe 2016). Attempts to recover double mutants for *Zmet2/Zmet5* were unsuccessful,  
105 suggesting at least partially redundant function for these paralogous genes.

106

107 Mutants for *mop1*, *mop3*, *zmet2* and *zmet5* are viable with relatively few major phenotypic  
108 changes (Dorweiler *et al.* 2000; Papa *et al.* 2001). The *mop1* and/or *mop3* mutations have been  
109 shown to play important roles in the regulation of specific maize loci (Dorweiler *et al.* 2000;

110 Alleman *et al.* 2006; Sloan *et al.* 2014), transgenes (McGinnis *et al.* 2006) or transposable  
111 elements (Lisch *et al.* 2002; Woodhouse *et al.* 2006). Microarray profiling of gene expression  
112 has revealed evidence for altered expression of small sets of genes in studies of *mop1*  
113 (*Madzima et al.* 2014) and *zmet2* (*Makarevitch et al.* 2007). There is also evidence from an  
114 RNAseq experiment for altered regulation of transposable element expression in apical  
115 meristem tissue (Jia *et al.* 2009). Transcriptome analysis of *rmr6*, which is allelic to *mop3*,  
116 provided evidence for a potential role in stress response (Forestan *et al.* 2016). The *rmr6*  
117 mutation appears to increase the proportion of the genome that is transcribed but has subtle  
118 effects at most loci with relatively few genes with significant changes in expression level  
119 (Forestan *et al.* 2017). However, there have not been comprehensive studies on the overlap of  
120 genes or transposons that are sensitive to mutations in different CMT or RdDM genes in maize.  
121  
122 Each of the mutant backgrounds used for this study has subtle effects on genomic methylation  
123 levels and can produce viable plants. There are several phenotypic abnormalities observed in  
124 *mop1* and *mop3* stocks (Dorweiler *et al.* 2000; Barber *et al.* 2012; Sloan *et al.* 2014) although  
125 the penetrance in multiple backgrounds has not been well characterized. We sought to  
126 determine if the subtle changes in DNA methylation in these mutants would reveal genes or  
127 transposons that are sensitive to these shifts in DNA methylation or chromatin. A limited number  
128 of genes and transposon families exhibit altered expression in these genotypes. A subset of  
129 these genes have high levels of DNA methylation in wild-type that are reduced in the mutant  
130 genotypes. Many of these genes exhibit natural variation for DNA methylation and gene  
131 expression. This provides evidence that the natural variation at these genes is due to epigenetic  
132 rather than genetic variation and highlights cryptic information present in the maize genome that  
133 could be accessible through alterations to the epigenome.

134

135

## MATERIALS AND METHODS

136 **Biological materials:** All the mutant and wild type samples used in this study are listed in Table  
137 S1 and SRA accession numbers are listed for each dataset. Tissue for RNA and DNA isolations  
138 was collected from three biological replicates. Plants were grown in standard greenhouse  
139 conditions for 20 days to reach the V3 stage. The 2<sup>nd</sup> and 3<sup>rd</sup> leaves were collected individually  
140 for each seedling. The 2<sup>nd</sup> leaf was used to isolate DNA for genotyping, and the 3<sup>rd</sup> leaf was used  
141 for RNA isolation and sequencing. For each biological replicate, 4-6 seedlings were pooled.

142

143 **Library preparation and sequencing:** Total RNA was isolated using the TRIZol reagent  
144 following the manufacturer's protocol. RNA was quantified using RiboGreen and 3 µg total RNA  
145 was used to construct libraries using TruSeq strand-specific kit (Illumina) following  
146 manufacturer's suggestions. The final library was quantified using PicoGreen and twelve  
147 libraries were pooled per Illumina lane. Library quality was checked using Agilent Bioanalyzer.  
148 Sequencing was performed on HiSeq2500 using 2 x 50 bp mode.

149

150 **Gene expression analysis:** Trim\_glore was used to trim low-quality base from the 3' end of the  
151 reads, as well as to remove adapters. Reads that passed quality control were mapped to B73  
152 version 4 genome (Jiao *et al.* 2017) using Tophat2 (Kim *et al.* 2013), allowing at most 1  
153 mismatch (-N 1) and the expected inner distance between mate pairs of 200 bp (-r 200). Reads  
154 that are properly paired and uniquely mapped were filtered out using samtools (-f 0x0002 -q  
155 50). HTSeq (Anders *et al.* 2015) was used to summarize the number of reads mapped to each  
156 V4 gene model with the union mode, generating a matrix of count values for each gene in each  
157 genotype.

158

159 Raw read counts were input into DEseq2 (Love *et al.* 2014) to perform differential expression  
160 analysis. Pair-wise comparisons were made between each mutant and the appropriate wild  
161 type. Genes with a FDR value of < 0.05 and  $\log_2(\text{FoldChange}) > 1$  were called differentially

162 expressed genes. Detailed analysis was restricted to genes with consistent DE calls in at least  
163 two mutant contrasts in the same pathway (RdDM or CMT). Genes were considered expressed  
164 if at least 3 replicates in the libraries described had an RPM (reads per million) value > 1.

165

166 **TE expression analysis:** B73v4 (Jiao *et al.* 2017) TE annotation was modified to remove  
167 helitrons and the file was resolved using RTrackLayer in R so that each base of the genome  
168 was assigned to only a single TE. Exon regions were masked from the TE file using Bedtools  
169 (Quinlan and Hall 2010) subtract. Gene annotations were added to this modified TE annotation  
170 file, and mapped reads were assigned to features using HTSeq (Anders *et al.* 2015). A custom  
171 script was used to read through the HTSeq sam output, assigning unique-mapping reads to  
172 individual TE elements and multi-mapped reads to TE families if mapped positions hit only a  
173 single TE family. Unique and multi-mapped reads were combined for per-family expression  
174 counts, and RPM values were calculated by normalizing to the number of gene reads plus TE  
175 family reads in each library. All reads mapped to gene annotations plus TE annotations were  
176 excluded from the TE expression analysis. Differentially expressed TE families were determined  
177 using DESeq2 (Love *et al.* 2014) using a  $\log_2(\text{FoldChange})$  cutoff of 1 and FDR adjusted p-value  
178 cutoff of 0.05. Detailed analysis was restricted to TE families with consistent DE calls in at least  
179 two mutant contrasts in the same pathway (RdDM or CMT).

180

181 **WGBS data analysis:** The WGBS datasets used in this study are detailed in Table S2 and SRA  
182 accession numbers for each sample are provided. One  $\mu\text{g}$  DNA was used to prepare libraries  
183 for whole-genome bisulfite sequencing using the KAPA library preparation kit. DNA was  
184 sheared to a peak between 200-250 bp. End repair was performed to make blunt-ended  
185 fragments, followed by adding base A to the 3' end, and adapter ligation. Size selection was  
186 performed to enrich library with a size between 250-450 bp. Bisulfite conversion was then  
187 carried out using Zymo DNA methylation lightning kit according to user's manual. Finally, library



188 was enriched using PCR amplification. Library quality was checked using the Agilent  
189 Bioanalyzer. Library quantification was performed with qPCR before sequencing. Sequencing  
190 was performed on HiSeq2000 with paired end 100 cycles.  
191 Analysis was performed as previously described (Li *et al.* 2015a; Song *et al.* 2016). Read quality  
192 was checked with FASTQC, adapters and low-quality bases at the 3' end of each read were  
193 trimmed using Trim\_galore. The high quality reads were mapped to B73 V4 genome (Jiao *et al.*  
194 2017) using BSMAP (Xi and Li 2009) allowing at most 5 mismatches. Only properly paired  
195 reads with unique mappings were kept and used for calling DNA methylation. Methylation calls  
196 were performed using the methratio.py script from BSMAP. Finally, DNA methylation in each  
197 context (CG, CHG, CHH) was summarized for each 100-bp non-overlapping tile of the 10 maize  
198 chromosomes.

199  
200 **DMR calling:** DMRs were called using previously described criteria (Li *et al.* 2015a). Briefly,  
201 each 100-bp tile with > 6 CG/CHG sites, > 2X coverage and > 60% difference for CG/CHG were  
202 compared. CHH DMRs were called using the same coverage and site number criteria, but with  
203 a requirement for <5% CHH in one genotype and >25% CHH in another genotype, reflecting the  
204 low level of CHH methylation in the maize genome.

205  
206 **mCHH Islands:** High CHH bins were called genome-wide by requiring CHH methylation over  
207 25% with at least 10 informative counts per bin. Genes and TEs were considered associated  
208 with a mCHH island if when at least one high methylation bin was identified within the gene or in  
209 the 2 kb region surrounding the gene.

210  
211 **Data availability:** All data used in this study are deposited at the NCBI Sequence Read Archive  
212 (SRA). Accession numbers for all libraries are listed in Table S1.

213

214  
215  
216  
217  
218  
219  
220  
221  
222  
223  
224  
225  
226  
227  
228  
229  
230  
231  
232  
233  
234  
235  
236  
237  
238

## RESULTS

### **Alteration of gene and transposon expression in maize mutants with perturbed methylomes:**

RNAseq was used to perform transcriptome profiling for several maize lines carrying mutations in genes encoding CMT (this study) or RdDM components (Gent *et al.* 2014; Li *et al.* 2015b). Together these factors are expected to be responsible for the majority of CHG and CHH methylation in the maize genome. For CMT genes, three biological replicates of seedling leaf tissue were profiled for mutations in two different genes, with multiple alleles utilized for one of the genes (Table S1). In addition, for the RdDM genes we analyzed seedling leaf tissue for *mop1* and *mop3* (Li *et al.* 2015b), along with immature ear tissue for *mop1* (Gent *et al.* 2014). The genetic background, read number and accession information for each sample is provided in Table S1.

The expression of individual genes was estimated from the RNAseq data for each sample. Differentially expressed (DE) genes in each mutant line (relative to the appropriate control) were identified using DESeq2 followed by a requirement for a minimum of 2 fold-change and an FDR value of less than 0.05 (Table S2). The observed differences in gene expression in the mutant lines could be direct effects of the mutation on expression, indirect effects caused by direct targets, or could be the result of introgressions of linked loci that contain cis-regulatory variation. The number of genes in each 2 Mb bin with differential expression was assessed throughout the genome (Figure S1). For mutations that were identified in one background and then backcrossed into another background (*zmet2-m1*, *zmet2-m2*, *zmet5*, *mop1*), there were often a cluster of DE genes surrounding the locus of the mutation itself. These regions often included similar numbers of up- and down-regulated genes. For the other mutation (*mop3*) that was not backcrossed into another genetic background, there is less evidence for expression changes at

239 linked genes (Figure S1). Based on these results we omitted DE genes located within 40 Mb of  
240 the mutation in subsequent analyses.

241

242 A principle component analysis was performed using all DE genes to cluster samples used in  
243 this study (Figure 1). This reveals that the major sources of differences are tissue and genetic  
244 background, as demonstrated, respectively, by the relatively larger differences for *mop1-ear* and  
245 *mop3* which was not introgressed into B73 (Figure 1A). When comparing only leaf libraries in  
246 the B73 background, few genotypes were substantially different from the wild-type controls,  
247 suggesting limited changes to transcript levels induced by each mutation (Figure 1B). The  
248 number of differentially expressed genes in each mutant genotype was highly variable (Figure  
249 1C). In most cases the homozygous mutant individuals exhibit more up-regulated genes than  
250 down-regulated genes, which is compatible with the concept that the CMT and RdDM genes  
251 normally provide silencing activities.

252

253 Transposable elements (TEs) comprise a large portion of the maize genome, and typically have  
254 high levels of CG and CHG methylation, with CHH methylation peaks at the edges of some TE  
255 families. There are two classes of TEs, Class I (retrotransposons) and Class II (DNA  
256 transposons), which transpose either through a copy-and-paste mechanism requiring an RNA  
257 intermediate (retrotransposons) or through a cut-and-paste mechanism (DNA transposons)  
258 (Wicker *et al.* 2007). Within each class are several orders divided into superfamilies,  
259 distinguished by structural and protein-coding features. Families within each superfamily are  
260 defined by sequence identity, and each family can contain any number of individual TE  
261 elements (Jiao *et al.* 2017). Individual TE elements are defined at a single location within a  
262 genome and are associated with a family, superfamily and class. We sought to document how  
263 minor perturbations to the methylome impacted expression of TEs. Due to the highly repetitive  
264 nature of TE sequences, we assessed per-family levels of expression by mapping RNA-seq

265 reads to the genome, reporting up to 20 best hits for each read using Tophat2. Per-family read  
266 counts were determined by summing unique mapping reads (to a specific element) and multi-  
267 mapping reads that align to only a single TE family. Overall, the total portion of RNAseq reads  
268 that map to TE families is not significantly higher in the mutants than in wild-type plants  
269 suggesting a lack of genome-wide activation of TEs in these mutants (Figure S2). In order to  
270 assess expression of individual TE families in each genotype, per-family expression was  
271 normalized by dividing the family counts by the total number of reads in the library assigned to  
272 either TE families or genes, generating an RPM estimate. Using this approach we were able to  
273 detect expression of 1,694 TE families in at least one of the genotypes used for this study. A  
274 relatively small number of DE TE families ( $\log_2FC > 1$ ,  $FDR < 0.05$ ) were identified in each  
275 mutant (Table S3; Figure 1D). Consistent with the role of DNA methylation in silencing TEs,  
276 more families were identified as up-regulated rather than down-regulated in mutants compared  
277 with WT controls. However, the majority of the TE families expressed in these libraries do not  
278 exhibit significant changes in expression level in CMT or RdDM mutants in maize.

279  
280 There is a significant overlap in the number of genes and TEs that exhibit consistent changes in  
281 gene expression in at least two samples of CMT mutants (*zmet2-m1/zmet2-m2/zmet5*) or RdDM  
282 mutants (*mop1/mop3*) (Figure S3). In order to understand the reproducible effects of these  
283 pathways on expression, we focused our analyses on the set of 237 genes and 104 TE families  
284 that exhibit consistent up- or down-regulation in multiple CMT or RdDM mutants. Hierarchical  
285 clustering of the expression level of these genes or TE families in all samples reveals evidence  
286 for many consistent changes in expression within a pathway (Figure 1E-F). Within CMT  
287 mutants, many genes show shared expression changes between *zmet2-m1* and *zmet2-m2*,  
288 though there is a smaller subset of genes primarily shared between *zmet2-m2* and *zmet5*  
289 (Figure 1E). Although both *zmet2-m1* and *zmet2-m2* are predicted to encode loss of function  
290 alleles, there are some genetic differences in the behavior of these alleles (Papa *et al.* 2001;

291 Makarevitch *et al.* 2007; Li *et al.* 2014). The *zmet2-m1* mutation exhibits partial dominance that  
292 may reflect dominant negative action of the protein that could be produced from this allele (Papa  
293 *et al.* 2001). Plants that are homozygous for *zmet2-m1* have the greatest loss of CHG  
294 methylation and this could result from influence of the *ZMET2* protein product on functional  
295 *ZMET5* protein. The *mop1* and *mop3* seedling leaf samples have a number of examples of  
296 consistent up-regulation but fewer examples of consistent down-regulation, consistent with the  
297 greater number of up-regulated than down-regulated genes in RdDM mutants in general.

298

299 **Some genes that are up-regulated in CMT mutants exhibit high CHG methylation levels:**

300 The differential expression observed in each mutant background could result from direct  
301 changes in DNA methylation or chromatin at these loci or could result from indirect effects due  
302 to secondary effects from genes that are direct targets. Given that many of these mutants are  
303 expected to affect DNA methylation levels, we might expect that wild-type plants would contain  
304 high levels of DNA methylation for genes that exhibit increased expression in the mutants. The  
305 context-specific DNA methylation profiles were assessed in wild-type B73 for genes that were  
306 up- or down- regulated compared with all expressed genes (Figure 2A). Genes that are  
307 differentially expressed in RdDM mutants exhibit slightly higher levels of CHH methylation  
308 upstream of the transcription start sites relative to all expressed genes. The genes that are  
309 down-regulated in CMT mutants do not show unusual patterns of DNA methylation. In contrast,  
310 genes that are up-regulated in the CMT mutants exhibit distinct patterns of CG and CHG  
311 methylation within gene bodies relative to other expressed genes (Figure 2A). Among the 112  
312 genes up-regulated in CMT mutants, approximately half have high (>50%) and half have low  
313 (<20%) methylation in the CG and CHG contexts (Figure 2B-C). In contrast, only ~4% of all  
314 expressed genes have high CHG methylation in the same region. While a small number of  
315 genes with high methylation overlap annotated TEs, most of the genes in this subset do not,  
316 suggesting that this genic methylation is not solely due to nearby TEs. In wild-type samples,

317 genes with high CHG methylation in the gene body also have high CG methylation (Figure 2D).  
318 However in *zmet2-m1* mutants, CHG methylation for these genes is reduced, with few examples  
319 of a corresponding reduction in CG methylation (Figure 2D-E). As in the examples  
320 (*Zm00001d045627* and *Zm00001d021982*) shown in Figure 2F, these genes have high levels of  
321 CG and CHG methylation in wild-type B73, and the reduction in CHG methylation in *zmet2-m1*  
322 mutants is associated with increased expression, suggesting that CMT-dependent silencing of  
323 these genes depends on CHG but not CG methylation.

324

325 **Genes that are up-regulated in RdDM mutants are enriched for being near mCHH islands:**

326 A large number of maize genes (~60%) have been associated with the presence of a region of  
327 elevated CHH in the promoter region, termed a mCHH island (Gent *et al.* 2013; Li *et al.* 2015b).  
328 Genes with mCHH islands are enriched for high expression and the mCHH island often occurs  
329 at the edge of the TE nearest these genes (Li *et al.* 2015b). These mCHH islands may form  
330 important boundaries that could protect TE heterochromatin from the influence of genes (Li *et*  
331 *al.* 2015b) and may also be important for long-distance interactions (Rowley *et al.* 2017). The  
332 methylation within these mCHH islands requires *mop1* and *mop3* (Li *et al.* 2014, 2015b). We  
333 sought to determine if the genes that exhibit altered expression in *mop1* and *mop3* are enriched  
334 for the presence of mCHH islands. Genes that are up- or down-regulated in the RdDM mutants  
335 are enriched for the presence of mCHH islands, but this is only significant for the up-regulated  
336 genes with 87.8% having a mCHH island within 2kb of the gene, compared to 64.6% of all  
337 expressed genes (Figure 2G). The fact that both RdDM up- and down-regulated genes are often  
338 near mCHH islands could be due to the fact that the mCHH island may provide long-range  
339 interactions (Rowley *et al.* 2017) that could have either positive or negative influences on gene  
340 expression.

341

342 In some cases, the mCHH island itself may result in transcriptional regulation. Work in  
343 *Arabidopsis* has noted a positive feedback loop involving DNA methylation levels and  
344 expression of the demethylase enzyme *ROS1* such that reduced levels of DNA methylation  
345 result in lower *Ros1* expression but increased methylation is associated with elevated *Ros1*  
346 expression (Williams *et al.* 2015). Reduced expression of maize DNA glycosylases has also  
347 been observed in several transcriptome datasets of maize RdDM mutants (Williams *et al.* 2015;  
348 Erhard *et al.* 2015). We find that one maize gene with sequence homology to *Ros1*,  
349 *Zm00001d038302*, showed significantly reduced expression in the *mop1* and *mop3* mutants  
350 and has a strong mCHH island in several inbred lines (Figure S4). This provides evidence to  
351 support a requirement for RdDM and CHH methylation in the proper control of this gene in  
352 maize.

353

#### 354 **Genes regulated by CMT are enriched for natural DMRs:**

355 The genes that are sensitive to mutations in CMT or RdDM components may reflect examples  
356 of natural variation for epigenetic regulation. Indeed, an earlier study has found that many of the  
357 genes influenced by *Zmet2* exhibit variable expression patterns in different maize inbreds  
358 (Makarevitch *et al.* 2007). We used WGBS data from B73 and 17 other diverse maize inbreds to  
359 document natural variation for DNA methylation among maize inbreds. Differentially Methylated  
360 Regions (DMRs) were identified in all three contexts (CG, CHG, and CHH) between B73 and  
361 the other inbreds. More than 200,000 DMRs were called in the CG and CHG contexts, with over  
362 50,000 DMRs in the CHH context. Each maize gene was classified based on whether there was  
363 a DMR within 200 bp of the transcription start site for each of the three sequence contexts. A  
364 relatively small portion (~3-7%) of maize genes have CG, CHG or CHH DMRs near the  
365 promoter (Table S2). We proceeded to assess whether naturally variable DMRs were more  
366 prevalent near genes that exhibit altered expression in CMT or RdDM mutants (Figure 3A).  
367 Genes that are up- or down-regulated in CMT mutants exhibit a significant enrichment for CG

368 and CHG DMRs in their promoter regions. RdDM up-regulated genes are significantly enriched  
369 for having CHH and CHG DMRs and also show an enrichment (though not significant) for CG  
370 DMRs near the promoter (Figure 3A).

371  
372 This suggests that many of the genes with altered expression in CMT or RdDM mutations may  
373 have pre-existing natural variation for DNA methylation that would affect expression levels in  
374 maize populations. RNAseq data from leaf tissue for ten of the inbred lines with WGBS data  
375 was utilized to determine whether there was a significant association (p.value < 0.05, pearson  
376 correlation) between context-specific methylation level at the DMR and gene expression levels.  
377 We found that nearly 50% of the genes that exhibit altered expression in CMT or RdDM mutants  
378 that are located near DMRs had natural variation for gene expression levels that was  
379 significantly associated with DNA methylation levels. Two examples of CMT up-regulated genes  
380 that exhibit significantly correlated expression and CHG methylation at the bin overlapping the  
381 TSS among diverse lines are shown in Figure 3B-C. In wild-type maize inbred lines we see two  
382 classes with respect to expression level and CHG methylation levels at the DMR near the TSS.  
383 In one group of lines, including B73, the DMR is highly methylated and the gene is  
384 transcriptionally silent. In the other group of genotypes (and in B73 *zmet2-m1* mutant lines -  
385 blue dots) the DMR has low methylation and the gene is expressed. Although we were  
386 interested in performing a similar analysis for natural variation in TE methylation and expression  
387 we were not able to assess this due to the highly polymorphic nature of TEs among different  
388 maize lines and the lack of de novo assemblies for other genotypes.

389

#### 390 **Properties of TEs with altered expression:**

391 There are 104 TE families with altered expression in mutants that perturb RdDM or CMT  
392 components in maize. These included 32 families up- and 7 families down-regulated in at least  
393 two contrasts of RdDM mutants, and 48 families up- and 24 families down-regulated in at least



394 two contrasts of CMT mutants (Figure 1D). There are examples of both class I (specifically Long  
395 Terminal Repeat or LTR) and class II (specifically Terminal Inverted Repeat or TIR) TE families  
396 that exhibit altered expression in both RdDM and CMT mutants (Figure 4A). Most families with  
397 varied expression were small (< 10 members), consistent with the genome-wide distribution  
398 (Figure 4B). The relative age of the LTR families that have altered expression was assessed to  
399 determine if they were particularly young or old families (Figure 4C). The relative ages of LTR  
400 transposons can be approximated by comparing the sequence similarity of the two LTR  
401 sequences. Since LTR sequences must be identical upon initial integration, a higher LTR  
402 similarity denotes younger TE insertions. LTR families that are up-regulated in RdDM mutants  
403 are enriched for younger LTR elements when compared with the distribution of ages present  
404 genome-wide. We also tested the mean GC content of TEs within families to test whether  
405 families depleted in cytosines are more susceptible to subtle perturbations in methylation, as is  
406 the case for the *ONSEN* family in *Arabidopsis* (Cavrak *et al.* 2014). TE families up-regulated in  
407 RdDM mutants do have a slightly lower GC content on average, though it is not clear if this  
408 change alone is sufficient to cause the expression changes (Figure 4D).

409  
410 We sought to further document the properties of these TE families through analysis of their  
411 expression in nearly 100 developmental tissues or stages of B73. During typical development,  
412 approximately 3,400 TE families are expressed in at least one tissue or stage. There are 5 TE  
413 families up-regulated in RdDM mutants and 18 TE families up-regulated in CMT mutants that  
414 are not expressed in any tissue or developmental stage assessed. The other families of TEs  
415 that are up-regulated in RdDM mutants (25 families) or CMT mutants (27 families) were  
416 assessed to determine if they exhibit distinct patterns of expression. Interestingly, approximately  
417 one third of the TE families that are up-regulated in RdDM mutants show higher expression in  
418 the endosperm than other tissues (Figure 5A). In contrast, the TE families up-regulated in CMT  
419 mutants do not show any evidence for higher expression in a particular tissue type. The

420 enrichment for endosperm expression in TE families up-regulated in RdDM mutants does not  
421 extend to genes up-regulated in the mutants and cannot be simply attributed to lower  
422 expression of the *Mop1* and *Mop3* genes in these tissues (Figure 5). This result highlights the  
423 potential for some TEs to escape RdDM-based silencing in endosperm, where dynamic  
424 changes to DNA methylation may reinforce TE silencing in the embryo (Martínez and Slotkin  
425 2012; Gehring 2013; Wang *et al.* 2015; Dong *et al.* 2017). Meanwhile, both genes and TE  
426 families susceptible to mis-regulation in CMT mutants are less often expressed across  
427 development, consistent with the greater developmental stability of CHG methylation over CHH  
428 methylation (Kawakatsu *et al.* 2016, 2017; Narsai *et al.* 2017; Bouyer *et al.* 2017).

429

#### 430 **Evidence for locus-specific and coordinated changes in expression of TEs:**

431 While per-family analysis is useful in capturing additional expression dynamics of repetitive  
432 transposable elements, the expression of individual elements can be influenced by a variety of  
433 location-specific attributes such as methylation levels and proximity to genes as well as family-  
434 level attributes such as binding motifs and nucleotide content. We were interested in  
435 documenting the relative behavior of different elements within the same family to understand  
436 whether the changes in expression of TEs were occurring in an element-specific or family-wide  
437 manner. Coordinate changes in expression could indicate the importance of RdDM or CMT for  
438 family-wide regulation while element-specific changes could reflect influences at particular loci.  
439 A set of TE families with <10 elements that had altered expression and for which at least 50% of  
440 the reads could be uniquely assigned to specific element were identified and used for analysis  
441 of coordinate versus locus-specific expression (Tables S3, S4). The unique mapping reads for  
442 these families were used to evaluate element-specific expression. Half of the testable TE  
443 families had expression of a single member of the family indicating locus-specific changes  
444 (examples in Figure 6A, C). In the other half of the TE families there was evidence for  
445 expression changes for multiple elements of the same family (Figure 6B, D). This suggests at

446 least some level of coordinate regulation of multiple members of the family by CMT or RdDM  
447 pathways. However, even in examples of coordinate expression a single element accounted for  
448 the vast majority of unique reads mapping to the family. Examples of both locus-specific and  
449 coordinate changes in expression for both CMT and RdDM mutants were found but we were not  
450 able to assess enough families to determine if there was any enrichment for the type of  
451 regulation for these two silencing pathways.

452

453

## DISCUSSION

454 Maize has been a model system for the discovery of several epigenetic phenomena such as  
455 imprinting (Kermicle 1970; Kermicle and Alleman 1990), paramutation (Brink 1956; Chandler  
456 2007; Hollick 2017) and transposon silencing (Chandler and Walbot 1986; Chomet *et al.* 1987).  
457 An unresolved question is whether epigenetic regulation plays important roles in quantitative  
458 trait variation beyond handful of well characterized loci. Our ability to document the full role for  
459 epigenetic regulation and DNA methylation has been limited by our inability to recover plants  
460 with major reductions in the level of DNA methylation (Li *et al.* 2014). Forward genetic screens  
461 have uncovered a number of components of the RNA-directed DNA methylation (RdDM)  
462 machinery as playing critical roles in maintenance of silenced paramutant states (Dorweiler *et*  
463 *al.* 2000; Jr *et al.* 2009) or transgene silencing (McGinnis *et al.* 2006). These mutants have  
464 substantial effects on CHH methylation in maize but have minimal effect on genome-wide levels  
465 of CG or CHG methylation (Li *et al.* 2014). Reverse-genetic analyses have identified loss-of-  
466 function alleles for a number of other genes predicted to play important roles in DNA  
467 methylation but the only single mutants with significant effects on genome-wide DNA  
468 methylation are the CMT genes of maize, *Zmet2* and *Zmet5* (Li *et al.* 2014). In this study we  
469 have documented how these subtle perturbations of the maize methylome affect the  
470 transcriptome in order to find genes subject to epigenetic regulation.

471

472 The effects of mutations in RdDM or CMT genes in maize are quite limited. Our evidence  
473 suggests that there is little effect on the overall transcriptome of these plants. This might be  
474 expected given the limited effect on overall plant phenotype for each of these mutations. A  
475 recent study found that *rmr6* (allelic to *mop3*) mutants exhibited transcription changes from a  
476 larger portion of the genome but much of this was associated with increased transcriptional  
477 ‘noise’ at lowly expressed regions (Forestan *et al.* 2017). However, there are sets of genes with  
478 clear changes in expression in each of the mutant lines in our study. Similarly, a directed  
479 analysis of differential expression in *rmr6* found a smaller set of genes with significant changes  
480 (Forestan *et al.* 2017). While relatively few genes exhibit major changes in expression there are  
481 a significant number of genes that exhibit similar expression changes in multiple RdDM or CMT  
482 mutants. These findings are compatible with the concept that there are a small number of genes  
483 in the maize genome that have epigenetic regulation that is solely dependent upon RdDM or  
484 CMT mediated regulation. It is likely that a much larger number of genes are redundantly  
485 regulated by the RdDM and CMT pathway along with MET1 mediated CG methylation.  
486  
487 Many of the genes that are up-regulated in CMT mutants exhibit high levels of CHG  
488 methylation. The CMT mutants reduce this methylation and allow for increased expression.  
489 Previous studies noted that the genes sensitive to *zmet2-m1* mutations varied in different maize  
490 inbreds (Makarevitch *et al.* 2007). This prompted us to investigate whether the genes that are  
491 up-regulated in CMT mutants might exhibit natural variation for DNA methylation levels. Many of  
492 the genes that are up-regulated in CMT mutants have CHG DMRs nearby and many of these  
493 exhibit variable levels of expression among maize genotypes that is negatively correlated with  
494 CHG methylation levels. This suggests epiallelic diversity for targets of CMT-mediated gene  
495 silencing. If these changes in expression lead to phenotypic variation, plant breeders are likely  
496 able to select for preferred epigenetic states. However, it would also be possible to introduce  
497 novel epigenetic variation through reductions of CHG methylation.

498

499 DNA methylation is often considered to play a primary role in maintaining genome integrity by  
500 silencing transposable elements. Indeed, there are clear examples of release of transposon  
501 silencing in mutants affecting DNA methylation in *Arabidopsis* (Miura *et al.* 2001; Mirouze *et al.*  
502 2009) and maize (Lisch *et al.* 2002; Jia *et al.* 2009). However, generating a complete  
503 understanding of transposon expression is complicated by the highly repetitive nature of  
504 transposable elements. In order to survey expression using RNAseq most researchers focus on  
505 unique mapping reads to ensure that expression is accurately attributed to the proper genomic  
506 locus. In this study we elected to primarily focus on TE families rather than individual elements  
507 and we utilized an approach that allowed for the combined use of unique and multiple-mapping  
508 reads to assess TE family expression. We did find evidence that a number of TE families  
509 require RdDM and/or CMT for silencing. There were few distinguishing features about these  
510 TEs relative to others making it unclear why the silencing of these families was easily released  
511 in these mutants. For several families we were able to document evidence for specific release of  
512 silencing of a single member of the family while in other cases we found that multiple members  
513 of the same family were reactivated.

514

515 This study defines a set of genes and TE families that are regulated by DNA methylation. The  
516 silencing of these genes and TEs relies solely upon RdDM or CMT based epigenetic regulation.  
517 These loci provide important insights into the mechanisms that allow for epigenetic regulation  
518 and the natural variation for epigenetic regulation in maize.

519

520

## ACKNOWLEDGEMENTS

521 We thank Peter Hermanson and Jonathan Giesler for technical assistance and Jonathan Gent

522 for helpful feedback. Funding for this work was grants from USDA-NIFA2016-67013-24747 to

523 N.M.S. and the National Science Foundation IOS-1237931 to N.M.S. and M.W.V. Q.L. was

524 supported by The National Key Research and Development Program of China (2016YFD0101003).

525

526  
527  
528  
529  
530  
531  
532  
533  
534  
535  
536  
537  
538  
539  
540  
541  
542  
543  
544  
545  
546  
547  
548  
549  
550  
551

## REFERENCES

- Alleman M., Sidorenko L., McGinnis K., Seshadri V., Dorweiler J. E., *et al.*, 2006 An RNA-dependent RNA polymerase is required for paramutation in maize. *Nature* 442: 295–298.
- Anders S., Pyl P. T., Huber W., 2015 HTSeq—a Python framework to work with high-throughput sequencing data. *Bioinformatics* 31: 166–169.
- Barber W. T., Zhang W., Win H., Varala K. K., Dorweiler J. E., *et al.*, 2012 Repeat associated small RNAs vary among parents and following hybridization in maize. *Proc. Natl. Acad. Sci. U. S. A.* 109: 10444–10449.
- Bouyer D., Kramdi A., Kassam M., Heese M., Schnittger A., *et al.*, 2017 DNA methylation dynamics during early plant life. *Genome Biol.* 18: 179.
- Brink R. A., 1956 A Genetic Change Associated with the R Locus in Maize Which Is Directed and Potentially Reversible. *Genetics* 41: 872–889.
- Cavrak V. V., Lettner N., Jamge S., Kosarewicz A., Bayer L. M., *et al.*, 2014 How a retrotransposon exploits the plant’s heat stress response for its activation. *PLoS Genet.* 10: e1004115.
- Chandler V. L., Walbot V., 1986 DNA modification of a maize transposable element correlates with loss of activity. *Proc. Natl. Acad. Sci. U. S. A.* 83: 1767–1771.
- Chandler V. L., 2007 Paramutation: from maize to mice. *Cell* 128: 641–645.
- Chomet P. S., Wessler S., Dellaporta S. L., 1987 Inactivation of the maize transposable element Activator (Ac) is associated with its DNA modification. *EMBO J.* 6: 295–302.
- Dong X., Zhang M., Chen J., Peng L., Zhang N., *et al.*, 2017 Dynamic and Antagonistic Allele-Specific Epigenetic Modifications Controlling the Expression of Imprinted Genes in Maize Endosperm. *Mol. Plant* 10: 442–455.
- Dorweiler J. E., Carey C. C., Kubo K. M., Hollick J. B., Kermicle J. L., *et al.*, 2000 Mediator of Paramutation1 is Required for Establishment and Maintenance of Paramutation at Multiple Maize Loci. *Plant Cell* 12: 2101–2118.

- 552 Eichten S. R., Swanson-Wagner R. A., Schnable J. C., Waters A. J., Hermanson P. J., *et al.*,  
553 2011 Heritable epigenetic variation among maize inbreds. *PLoS Genet.* 7: e1002372.
- 554 Eichten S. R., Briskine R., Song J., Li Q., Swanson-Wagner R., *et al.*, 2013 Epigenetic and  
555 genetic influences on DNA methylation variation in maize populations. *Plant Cell* 25: 2783–  
556 2797.
- 557 Erhard K. F. Jr, Stonaker J. L., Parkinson S. E., Lim J. P., Hale C. J., *et al.*, 2009 RNA  
558 polymerase IV functions in paramutation in *Zea mays*. *Science* 323: 1201–1205.
- 559 Erhard K. F. Jr, Talbot J.-E. R. B., Deans N. C., McClish A. E., Hollick J. B., 2015 Nascent  
560 transcription affected by RNA polymerase IV in *Zea mays*. *Genetics* 199: 1107–1125.
- 561 Forestan C., Aiese Cigliano R., Farinati S., Lunardon A., Sanseverino W., *et al.*, 2016 Stress-  
562 induced and epigenetic-mediated maize transcriptome regulation study by means of  
563 transcriptome reannotation and differential expression analysis. *Sci. Rep.* 6: 30446.
- 564 Forestan C., Farinati S., Aiese Cigliano R., Lunardon A., Sanseverino W., *et al.*, 2017 Maize  
565 RNA PolIV affects the expression of genes with nearby TE insertions and has a genome-wide  
566 repressive impact on transcription. *BMC Plant Biol.* 17: 161.
- 567 Gehring M., 2013 Genomic imprinting: insights from plants. *Annu. Rev. Genet.* 47: 187–208.
- 568 Gent J. I., Ellis N. A., Guo L., Harkess A. E., Yao Y., *et al.*, 2013 CHH islands: de novo DNA  
569 methylation in near-gene chromatin regulation in maize. *Genome Res.* 23: 628–637.
- 570 Gent J. I., Madzima T. F., Bader R., Kent M. R., Zhang X., *et al.*, 2014 Accessible DNA and  
571 relative depletion of H3K9me2 at maize loci undergoing RNA-directed DNA methylation. *Plant*  
572 *Cell* 26: 4903–4917.
- 573 Gouil Q., Baulcombe D. C., 2016 DNA Methylation Signatures of the Plant  
574 Chromomethyltransferases. *PLoS Genet.* 12: e1006526.
- 575 Hale C. J., Stonaker J. L., Gross S. M., Hollick J. B., 2007 A novel Snf2 protein maintains trans-  
576 generational regulatory states established by paramutation in maize. *PLoS Biol.* 5: 2156–2165.



577 Hofmeister B. T., Lee K., Rohr N. A., Hall D. W., Schmitz R. J., 2017 Stable inheritance of DNA  
578 methylation allows creation of epigenotype maps and the study of epiallele inheritance patterns  
579 in the absence of genetic variation. *Genome Biol.* 18: 155.

580 Hollick J. B., Kermicle J. L., Parkinson S. E., 2005 Rmr6 maintains meiotic inheritance of  
581 paramutant states in *Zea mays*. *Genetics* 171: 725–740.

582 Hollick J. B., 2017 Paramutation and related phenomena in diverse species. *Nature*  
583 reviews.*Genetics* 18: 5–23.

584 Hu L., Li N., Xu C., Zhong S., Lin X., *et al.*, 2014 Mutation of a major CG methylase in rice  
585 causes genome-wide hypomethylation, dysregulated genome expression, and seedling lethality.  
586 *Proc. Natl. Acad. Sci. U. S. A.* 111: 10642–10647.

587 Jia Y., Lisch D. R., Ohtsu K., Scanlon M. J., Nettleton D., *et al.*, 2009 Loss of RNA-dependent  
588 RNA polymerase 2 (RDR2) function causes widespread and unexpected changes in the  
589 expression of transposons, genes, and 24-nt small RNAs. *PLoS Genet.* 5: e1000737.

590 Jiao Y., Peluso P., Shi J., Liang T., Stitzer M. C., *et al.*, 2017 Improved maize reference genome  
591 with single-molecule technologies. *Nature* 546: 524–527.

592 Jr K. F. E., Stonaker J. L., Parkinson S. E., Lim J. P., Hale C. J., *et al.*, 2009 RNA polymerase  
593 IV functions in paramutation in *Zea mays*. *Science* 323: 1201–1205.

594 Kawakatsu T., Stuart T., Valdes M., Breakfield N., Schmitz R. J., *et al.*, 2016 Unique cell-type-  
595 specific patterns of DNA methylation in the root meristem. *Nature plants* 2: 16058.

596 Kawakatsu T., Nery J. R., Castanon R., Ecker J. R., 2017 Dynamic DNA methylation  
597 reconfiguration during seed development and germination. *Genome Biol.* 18: 171.

598 Kermicle J. L., 1970 Dependence of the R-Mottled Aleurone Phenotype in Maize on Mode of  
599 Sexual Transmission. *Genetics* 66: 69–85.

600 Kermicle J. L., Alleman M., 1990 Gametic imprinting in maize in relation to the angiosperm life  
601 cycle. *Development (Cambridge, England)*.Supplement: 9–14.

602 Kim D., Pertea G., Trapnell C., Pimentel H., Kelley R., *et al.*, 2013 TopHat2: accurate alignment  
603 of transcriptomes in the presence of insertions, deletions and gene fusions. *Genome Biol.* 14:  
604 R36–2013–14–4–r36.

605 Li Q., Eichten S. R., Hermanson P. J., Zaunbrecher V. M., Song J., *et al.*, 2014 Genetic  
606 perturbation of the maize methylome. *Plant Cell* 26: 4602–4616.

607 Li Q., Song J., West P. T., Zynda G., Eichten S. R., *et al.*, 2015a Examining the causes and  
608 consequences of context-specific differential DNA methylation in maize. *Plant Physiol.* 168:  
609 1262–1274.

610 Li Q., Gent J. I., Zynda G., Song J., Makarevitch I., *et al.*, 2015b RNA-directed DNA methylation  
611 enforces boundaries between heterochromatin and euchromatin in the maize genome. *Proc.*  
612 *Natl. Acad. Sci. U. S. A.* 112: 14728–14733.

613 Lisch D., Carey C. C., Dorweiler J. E., Chandler V. L., 2002 A mutation that prevents  
614 paramutation in maize also reverses Mutator transposon methylation and silencing. *Proc. Natl.*  
615 *Acad. Sci. U. S. A.* 99: 6130–6135.

616 Love M. I., Huber W., Anders S., 2014 Moderated estimation of fold change and dispersion for  
617 RNA-seq data with DESeq2. *Genome Biol.* 15: 550.

618 Madzima T. F., Huang J., McGinnis K. M., 2014 Chromatin structure and gene expression  
619 changes associated with loss of MOP1 activity in *Zea mays*. *Epigenetics* 9: 1047–1059.

620 Makarevitch I., Stupar R. M., Iniguez A. L., Haun W. J., Barbazuk W. B., *et al.*, 2007 Natural  
621 Variation for Alleles Under Epigenetic Control by the Maize Chromomethylase Zmet2. *Genetics*  
622 177: 749–760.

623 Martínez G., Slotkin R. K., 2012 Developmental relaxation of transposable element silencing in  
624 plants: functional or byproduct? *Curr. Opin. Plant Biol.* 15: 496–502.

625 McGinnis K. M., Springer C., Lin Y., Carey C. C., Chandler V., 2006 Transcriptionally silenced  
626 transgenes in maize are activated by three mutations defective in paramutation. *Genetics* 173:  
627 1637–1647.

- 628 Mirouze M., Reinders J., Bucher E., Nishimura T., Schneeberger K., *et al.*, 2009 Selective  
629 epigenetic control of retrotransposition in Arabidopsis. *Nature* 461: 427–430.
- 630 Miura A., Yonebayashi S., Watanabe K., Toyama T., Shimada H., *et al.*, 2001 Mobilization of  
631 transposons by a mutation abolishing full DNA methylation in Arabidopsis. *Nature* 411: 212–  
632 214.
- 633 Narsai R., Gouil Q., Secco D., Srivastava A., Karpievitch Y. V., *et al.*, 2017 Extensive  
634 transcriptomic and epigenomic remodelling occurs during Arabidopsis thaliana germination.  
635 *Genome Biol.* 18: 172.
- 636 Papa C. M., Springer N. M., Muszynski M. G., Meeley R., Kaeppler S. M., 2001 Maize  
637 chromomethylase *Zea methyltransferase2* is required for CpNpG methylation. *Plant Cell* 13:  
638 1919–1928.
- 639 Quinlan A. R., Hall I. M., 2010 BEDTools: a flexible suite of utilities for comparing genomic  
640 features. *Bioinformatics* 26: 841–842.
- 641 Regulski M., Lu Z., Kendall J., Donoghue M. T., Reinders J., *et al.*, 2013 The maize methylome  
642 influences mRNA splice sites and reveals widespread paramutation-like switches guided by  
643 small RNA. *Genome Res.* 23: 1651–1662.
- 644 Rowley M. J., Rothi M. H., Böhmendorfer G., Kuciński J., Wierzbicki A. T., 2017 Long-range  
645 control of gene expression via RNA-directed DNA methylation. *PLoS Genet.* 13: e1006749.
- 646 Sloan A. E., Sidorenko L., McGinnis K. M., 2014 Diverse gene-silencing mechanisms with  
647 distinct requirements for RNA polymerase subunits in *Zea mays*. *Genetics* 198: 1031–1042.
- 648 Song J., Zynda G., Beck S., Springer N. M., Vaughn M. W., 2016 Bisulfite Sequence Analyses  
649 Using CyVerse Discovery Environment: From Mapping to DMRs. In: *Current Protocols in Plant*  
650 *Biology*, John Wiley & Sons, Inc.
- 651 Wang P., Xia H., Zhang Y., Zhao S., Zhao C., *et al.*, 2015 Genome-wide high-resolution  
652 mapping of DNA methylation identifies epigenetic variation across embryo and endosperm in  
653 Maize (*Zea mays*). *BMC Genomics* 16: 21.

654 Wicker T., Sabot F., Hua-Van A., Bennetzen J. L., Capy P., *et al.*, 2007 A unified classification  
655 system for eukaryotic transposable elements. *Nature reviews.Genetics* 8: 973–982.

656 Williams B. P., Pignatta D., Henikoff S., Gehring M., 2015 Methylation-sensitive expression of a  
657 DNA demethylase gene serves as an epigenetic rheostat. *PLoS Genet.* 11: e1005142.

658 Woodhouse M. R., Freeling M., Lisch D., 2006 The mop1 (mediator of paramutation1) mutant  
659 progressively reactivates one of the two genes encoded by the MuDR transposon in maize.  
660 *Genetics* 172: 579–592.

661 Xi Y., Li W., 2009 BSMAP: whole genome bisulfite sequence MAPping program. *BMC*  
662 *Bioinformatics* 10: 232.

663 Yamauchi T., Johzuka-Hisatomi Y., Terada R., Nakamura I., Iida S., 2014 The MET1b gene  
664 encoding a maintenance DNA methyltransferase is indispensable for normal development in  
665 rice. *Plant Mol. Biol.* 85: 219–232.

666

667

FIGURES

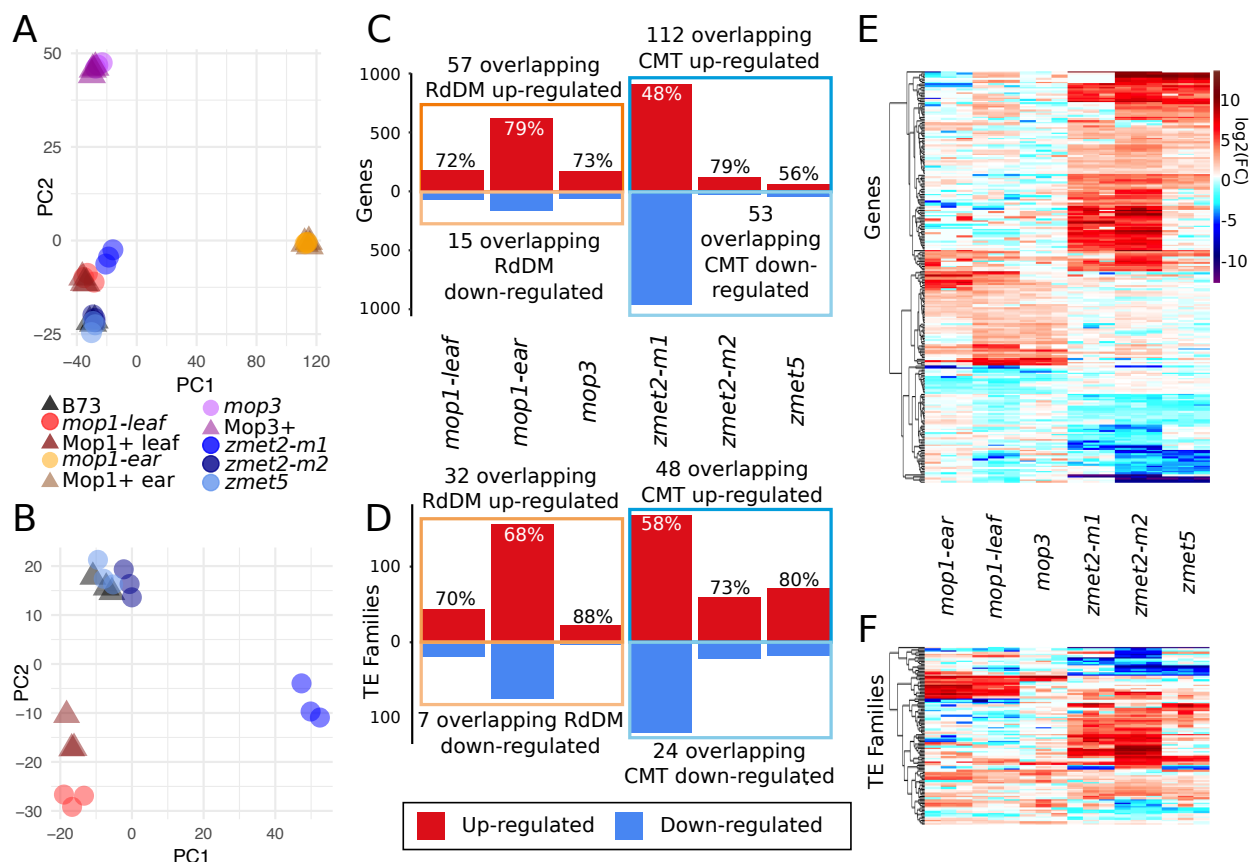

668

669 Figure 1: Summary of differentially expressed genes in mild methylation mutants. A-B: A  
 670 principal component analysis (PCA) was performed using log<sub>2</sub>(RPM+1) expression values for  
 671 genes that are DE in at least one mutant line relative to the appropriate control. (A) The full set  
 672 of samples used for this study were assessed and we found that samples in other genetic  
 673 backgrounds (*mop3* and *Mop3*) or tissues (*mop1* ear and *Mop1* ear) have the highest level of  
 674 variation. (B) A second PCA was performed using only samples in the B73 genetic background  
 675 assessed in leaf tissue. WT samples are denoted with triangles and mutants with circles. C-D:  
 676 The number of up- (red) and down-regulated (blue) genes (C) and TEs (D) is shown for each  
 677 mutant relative to the appropriate wild-type control. The percent of DE genes or TE families that  
 678 are up-regulated is marked above each bar, and the number of genes or TEs with consistent  
 679 changes in two or more mutants from the same pathway are labeled. E-F: Each of the genes (E)

680 or TE families (F) that are DE in at least two CMT or RdDM mutants were used to perform  
681 hierarchical clustering using the Euclidean method and the  $\log_2$  of the fold-change relative to  
682 wild-type is visualized with a heat map.

683

684

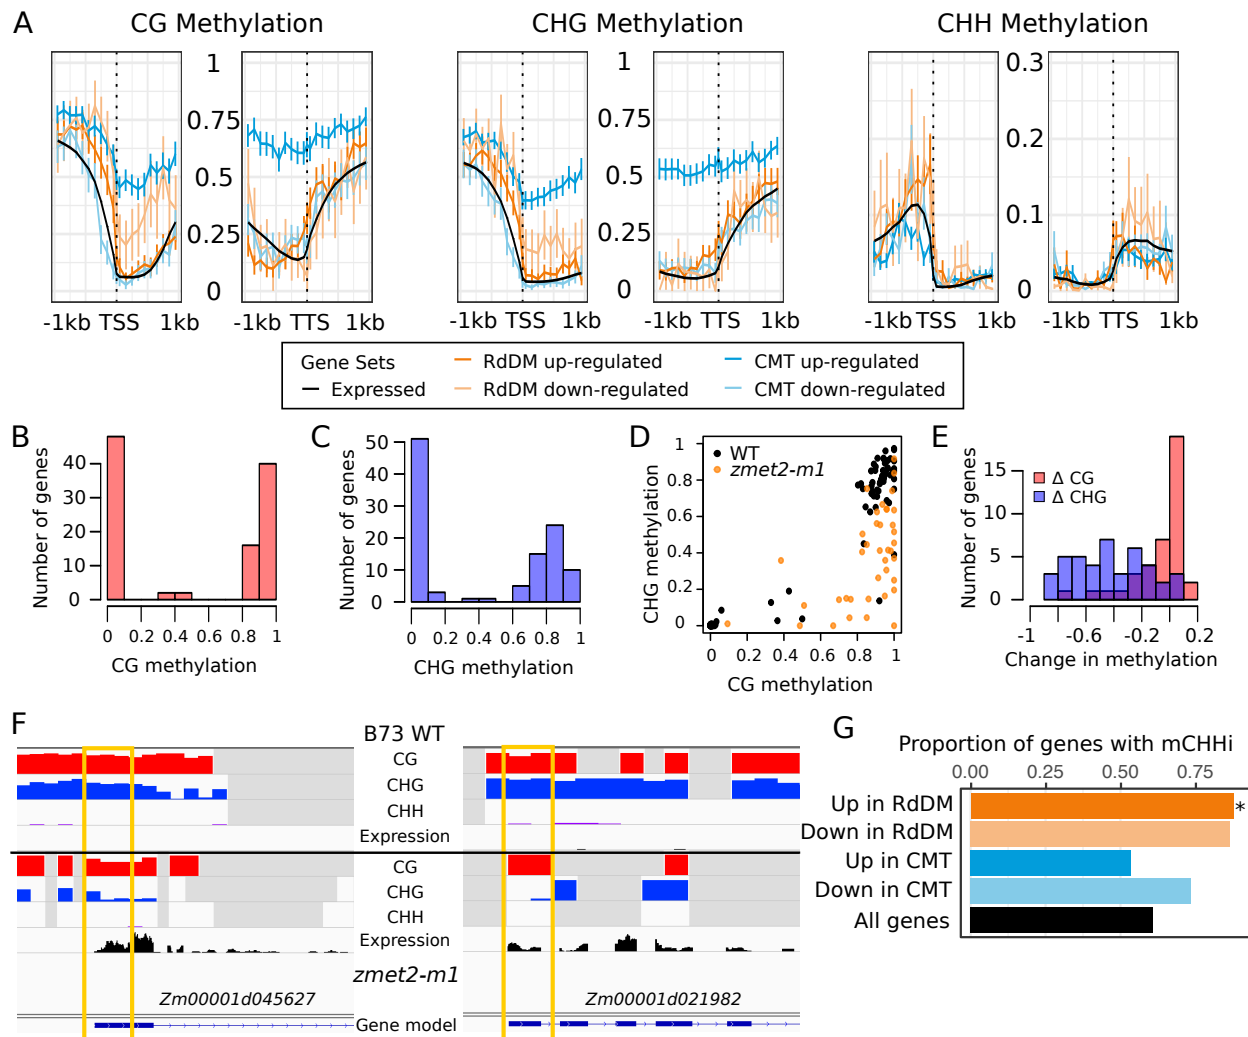

685  
 686 Figure 2: Methylation profiles of DE genes. A. The metaprofile of DNA methylation levels in wild-  
 687 type B73 seedling leaf tissue was assessed for different sets of DE genes. The DNA  
 688 methylation levels surrounding the TSS and TTS were plotted for all expressed genes and  
 689 genes DE in CMT (blue) and RdDM (orange) mutants. The three panels show the levels of CG,  
 690 CHG, and CHH methylation, with the y-axis showing DNA methylation levels. Error bars  
 691 represent standard error. B-C Histogram of the number of genes with different methylation  
 692 levels in the first 400 bp downstream of the TSS in the CG (B) and CHG (C) contexts, showing a  
 693 bimodal distribution of methylation values. D. Wild-type methylation levels in the CG and CHG  
 694 contexts are correlated. *zmet2-m1* mutant methylation data is shown for those genes with high

695 (>50%) CHG methylation in wild-type (orange dots), showing a loss of CHG but not CG  
696 methylation in the mutant. E. Histogram of the difference between mutant and WT methylation  
697 in the CG (red) and CHG (blue) contexts for those genes up-regulated in CMT mutants that  
698 have WT CHG methylation >50%. F. IGV view of two up-regulated genes in CMT mutants:  
699 *Zm00001d045627* and *Zm00001d021982*, which have high CG and CHG methylation in WT  
700 and reduced CHG methylation near the TSS (yellow box) in *zmet2-m1* mutants. G. The  
701 proportion of genes within 2 kb of mCHH islands (mCHHi) is shown for different sets of genes.  
702 The black bar shows the proportion of all genes with a mCHH island while the other bars show  
703 the proportion of genes with altered expression in specific mutant backgrounds that have mCHH  
704 islands, and \* denotes significantly higher proportion than expected relative to all genes (p-val <  
705 0.01, chi squared test).  
706  
707



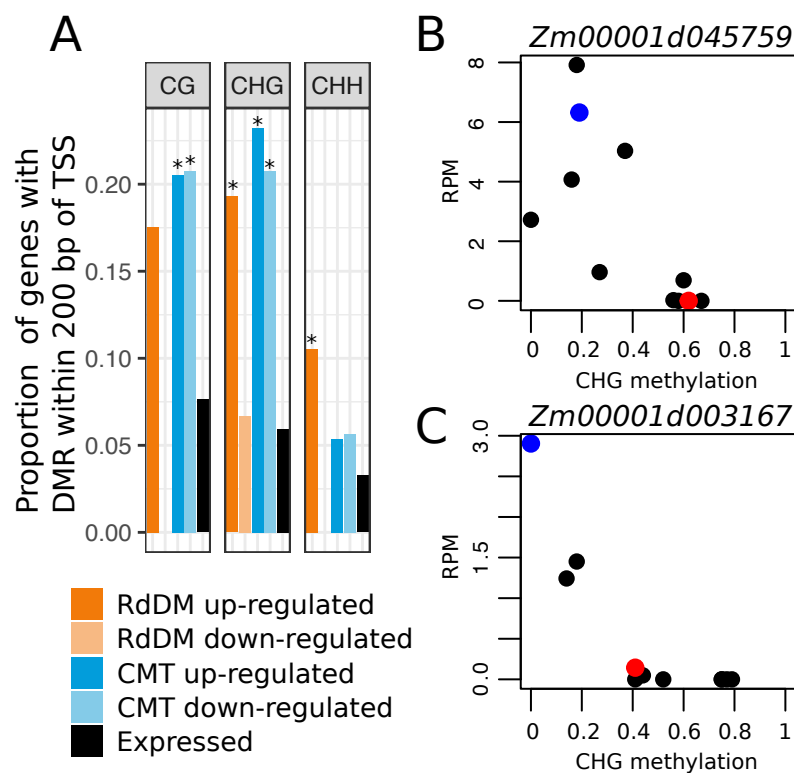

708

709 Figure 3. Natural variation for methylation level. A. DMRs in diverse genotypes located within  
 710 200 bp the TSS for all genes and for genes with differential expression in either CMT or RdDM  
 711 mutants. Significant enrichment compared with expressed set is denoted with \* (p-value < 0.01,  
 712 chi squared test). B-C. Examples of genes up-regulated in CMT that have negatively correlated  
 713 expression and CHG methylation at the bin overlapping the TSS. Data points show values for  
 714 B73 (red), *zmet2-m1* mutants (blue), and 9 diverse genotypes (B97, CML322, HP301, IL14,  
 715 Mo17, Oh43, P39, Tx303, and W22, black).

716

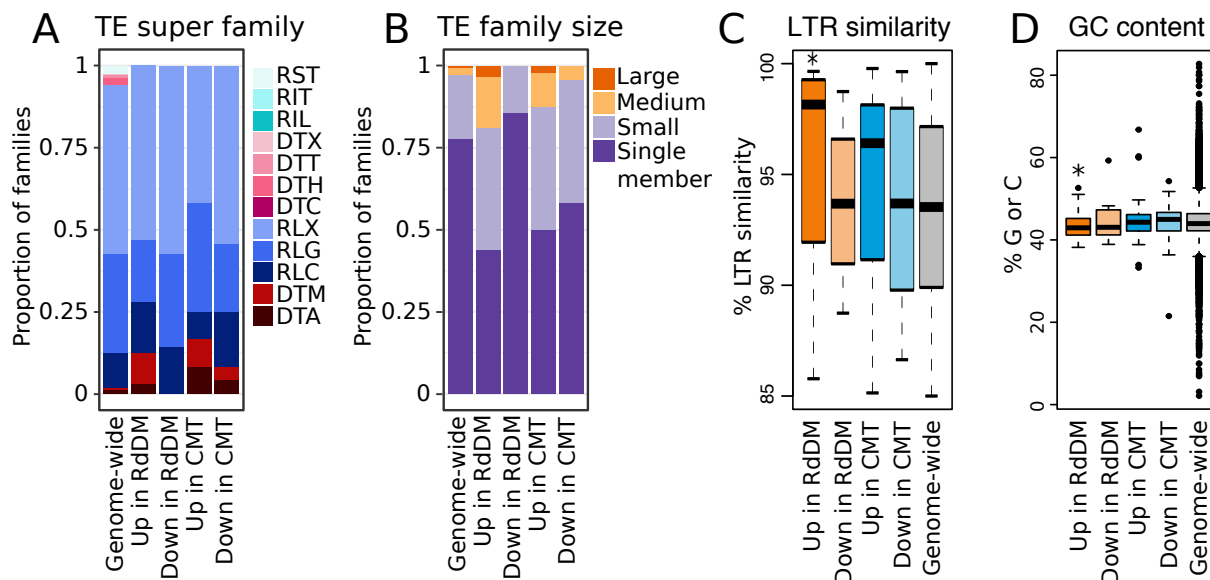

717

718 Figure 4. Attributes of TE families with altered expression in methylation mutants. A. TE super  
 719 family membership for TE families genome-wide and with varied expression in mutants, where  
 720 RST = SINE, RIT = LINE, RIL = LINE-L1-like, DTX = TIR-unclassified, DTT = TIR-Tc1/Mariner,  
 721 DTH = TIR-PIF/Harbinger, DTC = CACTA, RLX = LTR-unclassified, RLG = LTR-Gypsy, RLC =  
 722 LTR-Copia, DTM = TIR-Mu, and DTA = TIR-hAT. B. Size distribution for TE families genome-  
 723 wide and with varied expression in mutants, where small: 2-9 members, medium: 10-99  
 724 members, and large:  $\geq 100$  members. C. Boxplot of the average LTR similarity per-family for  
 725 LTR TE families genome-wide, along with those LTR families with differential expression in  
 726 methylation mutants. D. Boxplot of the average GC content per-family for TE families genome-  
 727 wide and with expression changes in the mutant. \* denotes significant deviation from the mean  
 728 for all TE families (p-value < 0.01, t-test).

729

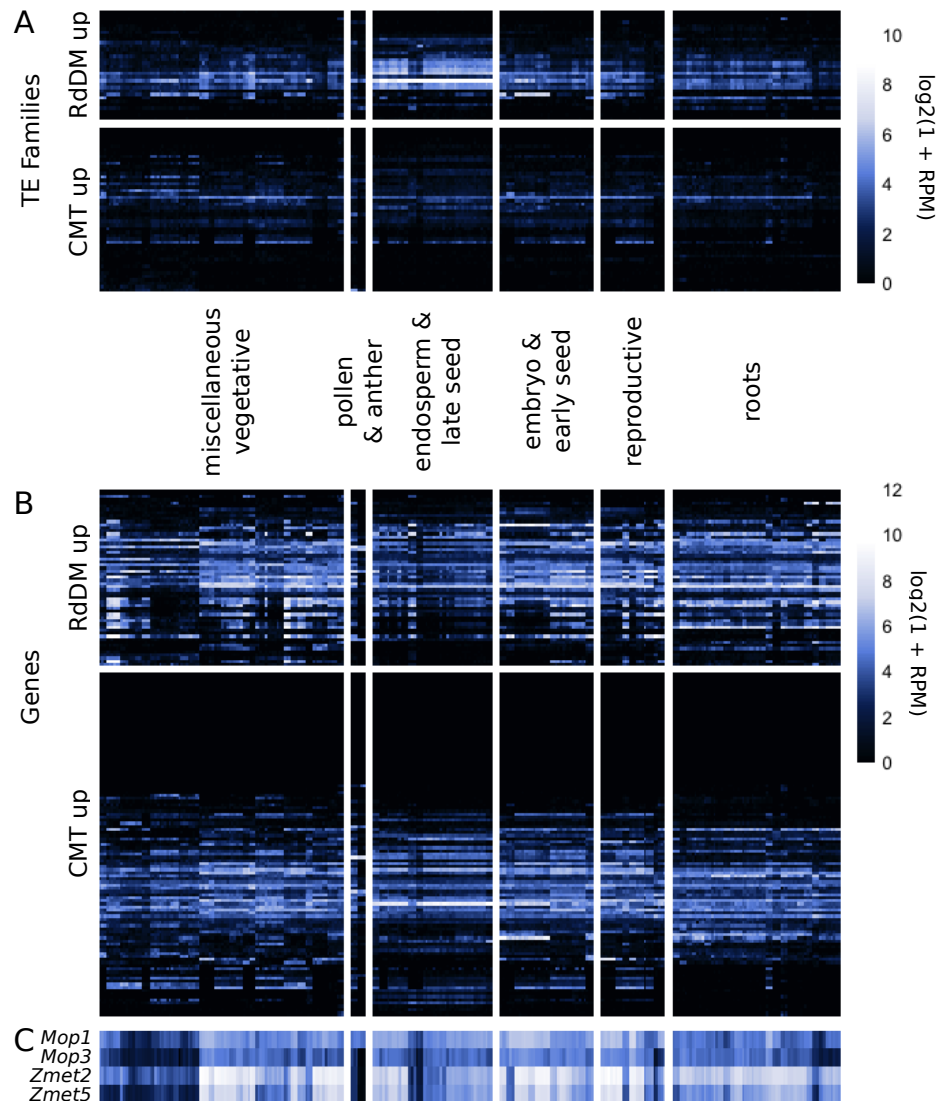

730

731 Figure 5. Developmental expression of TE families (A) and genes (B) up-regulated in RdDM and  
 732 CMT mutants, along with the typical expression of genes mutated in this study (C), where rows  
 733 show TE families or genes and columns show RNA-seq libraries. Developmental samples are  
 734 grouped by tissue type, with seed samples split into two clusters based on relative contribution  
 735 of endosperm: endosperm & late seed (12+ days after pollination) and embryo & early seed (up  
 736 to 10 days after pollination). For full list of tissue assignments and RNA-seq library accession  
 737 numbers, see Table S1. Approximately one third of TE families up-regulated in RdDM mutants  
 738 have higher expression in endosperm than other tissues across development, a pattern not

739 observed for genes. In contrast, many more TE families and genes up-regulated in CMT

740 mutants are never or lowly expressed during typical development.

741

742

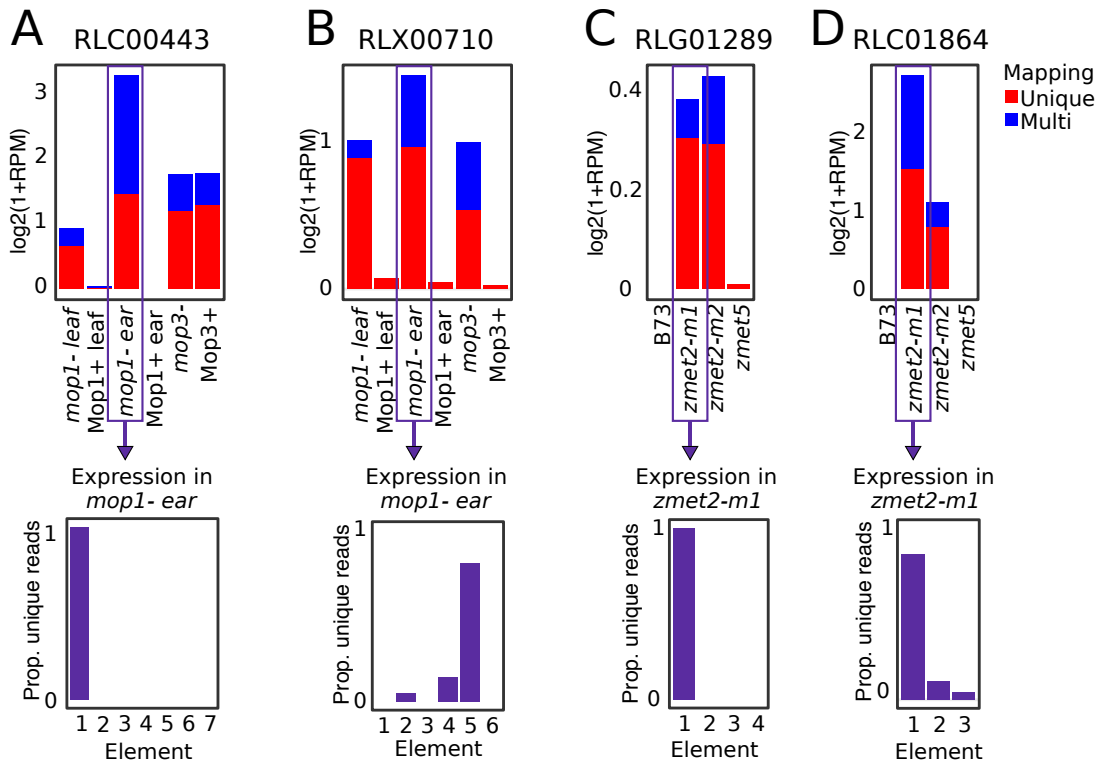

743

744 Figure 6: TE families up-regulated in methylation mutants can have expression of a single  
 745 element or multiple elements. A-B Show two LTR families up-regulated in RdDM mutants, and  
 746 C-D show two LTR families up-regulated in CMT mutants. All families have both unique (red)  
 747 and multi-mapped (blue) reads. The proportion of unique-mapping reads assigned to each  
 748 element is shown for a representative library. Unique-mapping reads showed confident  
 749 expression of only a single member of a family (A and C) or coordinated expression of more  
 750 than one member of a family (B and D).

751 SUPPLEMENTAL MATERIALS

752 Supplemental Figures S1-S4: attached as separate document

753

754 Table S1: Complete list of datasets used in this study.

755

756 Table S2: Expression values, differential expression calls, list assignments, and DMR calls for

757 all genes.

758

759 Table S3: Expression values, differential expression calls, list assignments, and descriptions for

760 all TE families.

761

762 Table S4: Unique mapping read counts and descriptors for each unique transposable element.
